# Supplementary material
Source: PubMed Central journal article supplement (PMC3035177)
Supplement: NIHMS34179-supplement-supp_mat.pdf [file NIHMS34179-supplement-supp_mat.pdf]

Time (min)

-10 0 10 20 30 40 50 60 70 80 90 100 110 120 130 140 150 160 170

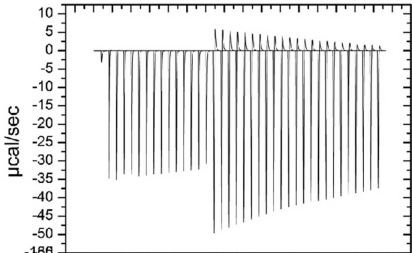

kcal/mole of injectant

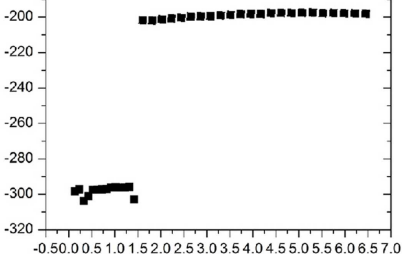

Isothermal titration calorimetry (ITC) data showing that lpg1 binds to DnaG very tight.

Lpg1 binding to DnaG is evident at approximately 1:1 molar ratio of lpg1:DnaG. The binding curve is not sigmoidal which characteristic of very tight binding ( $K_B > 10^9 \text{ M}^{-1}$ ).

Experimental details can be found in the 'Experimental procedures' section of the manuscript.
